# Supplementary material
Source: PubMed Central journal article supplement (PMC8205928)
Supplement: NIHMS1652316-supplement-Supplemental_Digital_Content_2__Missingness_Analysis.pdf [file NIHMS1652316-supplement-Supplemental_Digital_Content_2__Missingness_Analysis.pdf]

## Supplemental Digital Content: Missingness Analysis

Analysis of the 336,618 cases that met our study criteria using Little's Missing Completely at Random (MCAR) test showed that the data was not MCAR. There were 282,258 observations with complete data for PNB status, year, American Society of Anesthesiologists Physical Status (ASA PS), sex, and age. These observations also had complete data for workday and tissue expander use. 83,152 cases were only missing facility type. There were 189,854 observations that were also complete for facility region and facility type (Figure 1).

There were several notable findings in our missingness analysis. Missingness appeared similar across procedure type (lumpectomy versus mastectomy). In the group that did not receive PNB, there were more cases missing sex and location information. At 30%, facility type had the most missing data when analyzing missingness by PNB use, and ASA PS was also missing 13% overall. In analyzing missingness of other variables, cases with missing sex appeared to have a higher proportion of ASA PS 2 and a lower proportion of ASA PS 1. Also, those missing sex had a higher proportion of other facility type and a lower proportion of medium community hospital or university hospital type. These cases also had a higher proportion from the Midwest. Missing age appeared to follow the same pattern as missing sex, as these cases were more likely to be ASA PS 2 and come from other facility type (Table 1). Details of missingness analyses can be found in Table 2 through Table 7.

Of the 474 unique practice identifiers in the all case dataset, the largest contributor to the full data set contributed 3.5% of cases, and the top 10 practices contributed 20% of all cases. After removal of cases with missing data 282 practices remained. The top contributor became the second highest contributor, and the largest practice comprised 2.1% of cases. The top 10 practices in the complete case set contributed 14% of all cases.

**Figure 1.** Missingness pattern within all cases.

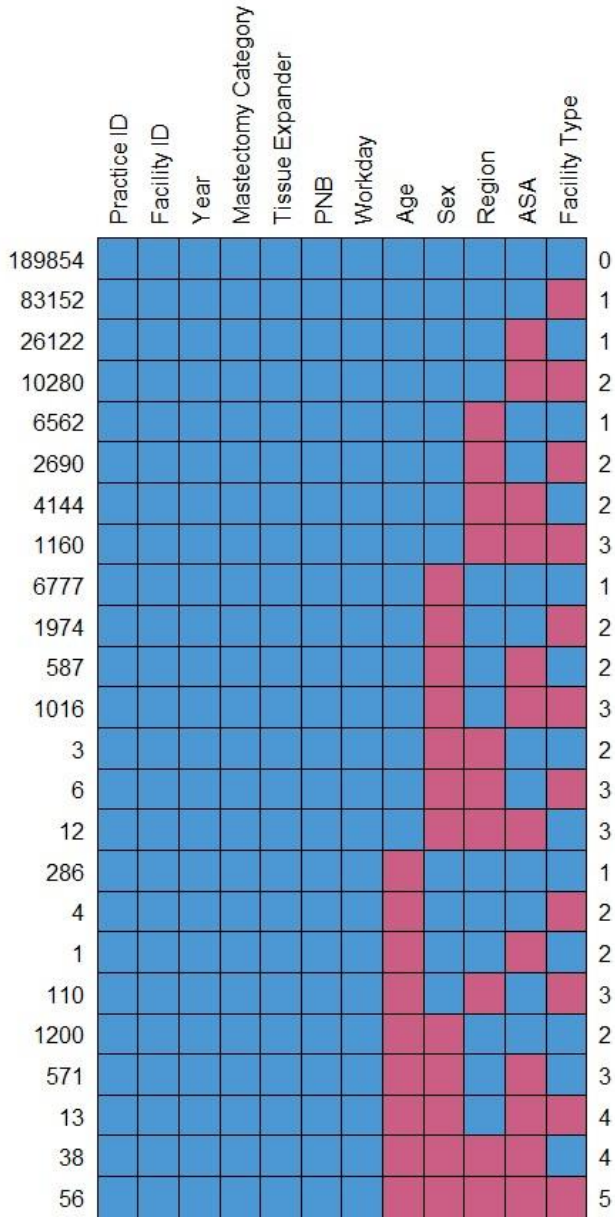

Little's missing completely at random (MCAR) test showed that the data was not MCAR. There were 189,854 cases with complete data. Left axis indicates number of cases that matched missingness pattern. Right axis shows number of missing factors in missingness pattern. Top axis shows factors. Blue indicates not missing. Red indicates missing. PNB = peripheral nerve block; ASA = American Society of Anesthesiologists Physical Status.

**Table 1.** Missingness by procedure type (lumpectomy versus mastectomy) among all cases.

| <b>Missing factor<sup>1</sup></b>        | <b>Overall, N = 336,618</b> | <b>Lumpectomy, N =<br/>289,666</b> | <b>Mastectomy, N = 46,952</b> |
|------------------------------------------|-----------------------------|------------------------------------|-------------------------------|
| Age                                      | 2,279 (0.7%)                | 1,994 (0.7%)                       | 285 (0.6%)                    |
| Sex                                      | 12,253 (3.6%)               | 10,695 (3.7%)                      | 1,558 (3.3%)                  |
| ASA PS                                   | 44,000 (13%)                | 37,496 (13%)                       | 6,504 (14%)                   |
| Location                                 | 14,781 (4.4%)               | 12,279 (4.2%)                      | 2,502 (5.3%)                  |
| Facility type                            | 100,461 (30%)               | 86,875 (30%)                       | 13,586 (29%)                  |
| <sup>1</sup> Statistics presented: n (%) |                             |                                    |                               |

Missingness appears similar across procedure type. ASA PS = American Society of Anesthesiologists Physical Status.

**Table 2.** Missingness by peripheral nerve block use among all cases.

| <b>Missing factor<sup>1</sup></b>        | <b>Overall, N = 336,618</b> | <b>Has PNB, N = 2,465</b> | <b>No PNB, N = 334,153</b> |
|------------------------------------------|-----------------------------|---------------------------|----------------------------|
| Age                                      | 2,279 (0.7%)                | 8 (0.3%)                  | 2,271 (0.7%)               |
| Sex                                      | 12,253 (3.6%)               | 8 (0.3%)                  | 12,245 (3.7%)              |
| ASA PS                                   | 44,000 (13%)                | 356 (14%)                 | 43,644 (13%)               |
| Location                                 | 14,781 (4.4%)               | 42 (1.7%)                 | 14,739 (4.4%)              |
| Facility type                            | 100,461 (30%)               | 933 (38%)                 | 99,528 (30%)               |
| <sup>1</sup> Statistics presented: n (%) |                             |                           |                            |

There appears to be a slight imbalance for missing sex and location. Facility type has the most missingness at 30%. ASA PS is 13% missing overall. PNB = peripheral nerve block; ASA PS = American Society of Anesthesiologists Physical Status.

**Table 3.** Missingness by age among all cases.

| Missing factor <sup>1</sup>                   | Not Missing, N = 334,339 | Missing, N = 2,279 |
|-----------------------------------------------|--------------------------|--------------------|
| Use of Peripheral Nerve Block                 | 2,457 (0.7%)             | 8 (0.4%)           |
| Surgical Procedure                            |                          |                    |
| Lumpectomy                                    | 287,672 (86%)            | 1,994 (87%)        |
| Mastectomy                                    | 46,667 (14%)             | 285 (13%)          |
| Age                                           | 57 (46, 68)              | –                  |
| Unknown                                       | 0                        | 2,279              |
| ASA PS                                        |                          |                    |
| 1                                             | 67,827 (23%)             | 84 (5.2%)          |
| 2                                             | 139,514 (48%)            | 1,188 (74%)        |
| 3                                             | 79,014 (27%)             | 315 (20%)          |
| 4                                             | 4,586 (1.6%)             | 13 (0.8%)          |
| 5                                             | 72 (<0.1%)               | 0 (0%)             |
| 6                                             | 5 (<0.1%)                | 0 (0%)             |
| Unknown                                       | 43,321                   | 679                |
| Male (vs Female)                              | 8,329 (2.6%)             | 11 (2.7%)          |
| Unknown                                       | 10,375                   | 1,878              |
| Facility Type                                 |                          |                    |
| University Hospital                           | 26,420 (11%)             | 108 (5.2%)         |
| Large Community Hospital (over 500 beds)      | 42,309 (18%)             | 622 (30%)          |
| Medium Community Hospital (100-500 beds)      | 96,382 (41%)             | 221 (11%)          |
| Small Community Hospital (less than 100 beds) | 15,398 (6.6%)            | 9 (0.4%)           |
| Specialty Hospital                            | 6,205 (2.7%)             | 1 (<0.1%)          |
| Other                                         | 47,347 (20%)             | 1,135 (54%)        |
| Unknown                                       | 100,278                  | 183                |
| Facility Region                               |                          |                    |
| Region 1 Northeast                            | 62,777 (20%)             | 111 (5.3%)         |
| Region 2 Midwest                              | 71,998 (23%)             | 1,309 (63%)        |
| Region 3 South                                | 125,903 (39%)            | 12 (0.6%)          |
| Region 4 West                                 | 59,084 (18%)             | 643 (31%)          |
| Unknown                                       | 14,577                   | 204                |
| Workday (vs weekend/holiday)                  |                          |                    |
| Weekend/Holiday                               | 10,155 (3.0%)            | 49 (2.2%)          |
| Workday                                       | 324,184 (97%)            | 2,230 (98%)        |
| Has Tissue Expander                           | 798 (0.2%)               | 8 (0.4%)           |
| Year of procedure                             |                          |                    |
| 2010                                          | 21,822 (6.5%)            | 240 (11%)          |
| 2011                                          | 26,677 (8.0%)            | 639 (28%)          |
| 2012                                          | 33,185 (9.9%)            | 432 (19%)          |
| 2013                                          | 36,014 (11%)             | 362 (16%)          |
| 2014                                          | 44,205 (13%)             | 263 (12%)          |
| 2015                                          | 50,736 (15%)             | 225 (9.9%)         |
| 2016                                          | 52,421 (16%)             | 8 (0.4%)           |
| 2017                                          | 28,330 (8.5%)            | 110 (4.8%)         |
| 2018                                          | 40,949 (12%)             | 0 (0%)             |

<sup>1</sup> Statistics presented: n (%); median (IQR)

Cases missing age appear to be more likely to come from “Other” facility type.

ASA PS = American Society of Anesthesiologists Physical Status.

**Table 4.** Missingness by sex among all cases.

| Missing factor <sup>1</sup>                   | Not Missing, N = 324,365 | Missing, N = 12,253 |
|-----------------------------------------------|--------------------------|---------------------|
| Use of Peripheral Nerve Block                 | 2,457 (0.8%)             | 8 (<0.1%)           |
| Surgical Procedure                            |                          |                     |
| Lumpectomy                                    | 278,971 (86%)            | 10,695 (87%)        |
| Mastectomy                                    | 45,394 (14%)             | 1,558 (13%)         |
| Age                                           | 57 (46, 68)              | 56 (46, 67)         |
| Unknown                                       | 401                      | 1,878               |
| ASA PS                                        |                          |                     |
| 1                                             | 67,030 (24%)             | 881 (8.8%)          |
| 2                                             | 134,399 (48%)            | 6,303 (63%)         |
| 3                                             | 76,649 (27%)             | 2,680 (27%)         |
| 4                                             | 4,503 (1.6%)             | 96 (1.0%)           |
| 5                                             | 72 (<0.1%)               | 0 (0%)              |
| 6                                             | 5 (<0.1%)                | 0 (0%)              |
| Unknown                                       | 41,707                   | 2,293               |
| Male (vs Female)                              | 8,340 (2.6%)             | –                   |
| Unknown                                       | 0                        | 12,253              |
| Facility Type                                 |                          |                     |
| University Hospital                           | 26,184 (12%)             | 344 (3.7%)          |
| Large Community Hospital (over 500 beds)      | 40,922 (18%)             | 2,009 (22%)         |
| Medium Community Hospital (100-500 beds)      | 95,031 (42%)             | 1,572 (17%)         |
| Small Community Hospital (less than 100 beds) | 15,001 (6.6%)            | 406 (4.4%)          |
| Specialty Hospital                            | 6,061 (2.7%)             | 145 (1.6%)          |
| Other                                         | 43,770 (19%)             | 4,712 (51%)         |
| Unknown                                       | 97,396                   | 3,065               |
| Facility Region                               |                          |                     |
| Region 1 Northeast                            | 61,107 (20%)             | 1,781 (15%)         |
| Region 2 Midwest                              | 67,233 (22%)             | 6,074 (50%)         |
| Region 3 South                                | 122,706 (40%)            | 3,209 (26%)         |
| Region 4 West                                 | 58,653 (19%)             | 1,074 (8.8%)        |
| Unknown                                       | 14,666                   | 115                 |
| Workday (vs weekend/holiday)                  |                          |                     |
| Weekend/Holiday                               | 9,939 (3.1%)             | 265 (2.2%)          |
| Workday                                       | 314,426 (97%)            | 11,988 (98%)        |
| Has Tissue Expander                           | 719 (0.2%)               | 87 (0.7%)           |
| Year of procedure                             |                          |                     |
| 2010                                          | 21,340 (6.6%)            | 722 (5.9%)          |
| 2011                                          | 25,985 (8.0%)            | 1,331 (11%)         |
| 2012                                          | 32,450 (10%)             | 1,167 (9.5%)        |
| 2013                                          | 35,063 (11%)             | 1,313 (11%)         |
| 2014                                          | 42,508 (13%)             | 1,960 (16%)         |
| 2015                                          | 48,383 (15%)             | 2,578 (21%)         |
| 2016                                          | 52,147 (16%)             | 282 (2.3%)          |
| 2017                                          | 26,561 (8.2%)            | 1,879 (15%)         |
| 2018                                          | 39,928 (12%)             | 1,021 (8.3%)        |

<sup>1</sup> Statistics presented: n (%); median (IQR)

Cases missing sex appear to have slightly higher proportion of ASA PS 2 and slightly lower proportion of ASA PS 1. Cases missing sex also have a higher proportion of cases from “Other” facility type and slightly lower proportion of cases from “Medium Community Hospital” or “University Hospital”. ASA PS = American Society of Anesthesiologists Physical Status.

**Table 5.** Missingness by ASA PS among all cases.

| Missing factor <sup>1</sup>                   | Not Missing, N = 292,618 | Missing, N = 44,000 |
|-----------------------------------------------|--------------------------|---------------------|
| Use of Peripheral Nerve Block                 | 2,109 (0.7%)             | 356 (0.8%)          |
| Surgical Procedure                            |                          |                     |
| Lumpectomy                                    | 252,170 (86%)            | 37,496 (85%)        |
| Mastectomy                                    | 40,448 (14%)             | 6,504 (15%)         |
| Age                                           | 57 (46, 68)              | 58 (46, 69)         |
| Unknown                                       | 1,600                    | 679                 |
| ASA PS                                        |                          |                     |
| 1                                             | 67,911 (23%)             | –                   |
| 2                                             | 140,702 (48%)            | –                   |
| 3                                             | 79,329 (27%)             | –                   |
| 4                                             | 4,599 (1.6%)             | –                   |
| 5                                             | 72 (<0.1%)               | –                   |
| 6                                             | 5 (<0.1%)                | –                   |
| Unknown                                       | 0                        | 44,000              |
| Male (vs Female)                              | 7,191 (2.5%)             | 1,149 (2.8%)        |
| Unknown                                       | 9,960                    | 2,293               |
| Facility Type                                 |                          |                     |
| University Hospital                           | 23,304 (11%)             | 3,224 (10%)         |
| Large Community Hospital (over 500 beds)      | 37,562 (18%)             | 5,369 (17%)         |
| Medium Community Hospital (100-500 beds)      | 83,128 (41%)             | 13,475 (43%)        |
| Small Community Hospital (less than 100 beds) | 14,023 (6.9%)            | 1,384 (4.4%)        |
| Specialty Hospital                            | 6,204 (3.0%)             | 2 (<0.1%)           |
| Other                                         | 40,461 (20%)             | 8,021 (25%)         |
| Unknown                                       | 87,936                   | 12,525              |
| Facility Region                               |                          |                     |
| Region 1 Northeast                            | 54,682 (19%)             | 8,206 (21%)         |
| Region 2 Midwest                              | 69,994 (25%)             | 3,313 (8.6%)        |
| Region 3 South                                | 108,992 (38%)            | 16,923 (44%)        |
| Region 4 West                                 | 49,579 (18%)             | 10,148 (26%)        |
| Unknown                                       | 9,371                    | 5,410               |
| Workday (vs weekend/holiday)                  |                          |                     |
| Weekend/Holiday                               | 9,531 (3.3%)             | 673 (1.5%)          |
| Workday                                       | 283,087 (97%)            | 43,327 (98%)        |
| Has Tissue Expander                           | 803 (0.3%)               | 3 (<0.1%)           |
| Year of procedure                             |                          |                     |
| 2010                                          | 18,689 (6.4%)            | 3,373 (7.7%)        |
| 2011                                          | 23,410 (8.0%)            | 3,906 (8.9%)        |
| 2012                                          | 29,997 (10%)             | 3,620 (8.2%)        |
| 2013                                          | 33,213 (11%)             | 3,163 (7.2%)        |
| 2014                                          | 39,823 (14%)             | 4,645 (11%)         |
| 2015                                          | 46,196 (16%)             | 4,765 (11%)         |
| 2016                                          | 46,673 (16%)             | 5,756 (13%)         |
| 2017                                          | 21,248 (7.3%)            | 7,192 (16%)         |
| 2018                                          | 33,369 (11%)             | 7,580 (17%)         |

<sup>1</sup> Statistics presented: n (%); median (IQR)

ASA PS = American Society of Anesthesiologists Physical Status.

**Table 6.** Missingness by facility region among all cases.

| <b>Missing factor<sup>1</sup></b>             | <b>Not Missing, N = 321,837</b> | <b>Missing, N = 14,781</b> |
|-----------------------------------------------|---------------------------------|----------------------------|
| Use of Peripheral Nerve Block                 | 2,423 (0.8%)                    | 42 (0.3%)                  |
| Surgical Procedure                            |                                 |                            |
| Lumpectomy                                    | 27,7387 (86%)                   | 12,279 (83%)               |
| Mastectomy                                    | 44,450 (14%)                    | 2,502 (17%)                |
| Age                                           | 57 (46, 68)                     | 57 (45, 67)                |
| Unknown                                       | 2,075                           | 204                        |
| ASA PS                                        |                                 |                            |
| 1                                             | 66,807 (24%)                    | 1,104 (12%)                |
| 2                                             | 136,231 (48%)                   | 4,471 (48%)                |
| 3                                             | 75,665 (27%)                    | 3,664 (39%)                |
| 4                                             | 4,469 (1.6%)                    | 130 (1.4%)                 |
| 5                                             | 70 (<0.1%)                      | 2 (<0.1%)                  |
| 6                                             | 5 (<0.1%)                       | 0 (0%)                     |
| Unknown                                       | 38,590                          | 5,410                      |
| Male (vs Female)                              | 7,990 (2.6%)                    | 350 (2.4%)                 |
| Unknown                                       | 12,138                          | 115                        |
| Facility Type                                 |                                 |                            |
| University Hospital                           | 20,690 (9.2%)                   | 5,838 (54%)                |
| Large Community Hospital (over 500 beds)      | 42,075 (19%)                    | 856 (8.0%)                 |
| Medium Community Hospital (100-500 beds)      | 93,731 (42%)                    | 2,872 (27%)                |
| Small Community Hospital (less than 100 beds) | 15,220 (6.8%)                   | 187 (1.7%)                 |
| Specialty Hospital                            | 6,206 (2.8%)                    | 0 (0%)                     |
| Other                                         | 47,476 (21%)                    | 1,006 (9.4%)               |
| Unknown                                       | 96,439                          | 4,022                      |
| Facility Region                               |                                 |                            |
| Region 1 Northeast                            | 62,888 (20%)                    | –                          |
| Region 2 Midwest                              | 73,307 (23%)                    | –                          |
| Region 3 South                                | 125,915 (39%)                   | –                          |
| Region 4 West                                 | 59,727 (19%)                    | –                          |
| Unknown                                       | 0                               | 14,781                     |
| Workday (vs weekend/holiday)                  |                                 |                            |
| Weekend/Holiday                               | 9,957 (3.1%)                    | 247 (1.7%)                 |
| Workday                                       | 311,880 (97%)                   | 14,534 (98%)               |
| Has Tissue Expander                           | 794 (0.2%)                      | 12 (<0.1%)                 |
| Year of Procedure                             |                                 |                            |
| 2010                                          | 20,705 (6.4%)                   | 1,357 (9.2%)               |
| 2011                                          | 25,809 (8.0%)                   | 1,507 (10%)                |
| 2012                                          | 31,819 (9.9%)                   | 1,798 (12%)                |
| 2013                                          | 34,424 (11%)                    | 1,952 (13%)                |
| 2014                                          | 42,350 (13%)                    | 2,118 (14%)                |
| 2015                                          | 48,860 (15%)                    | 2,101 (14%)                |
| 2016                                          | 50,155 (16%)                    | 2,274 (15%)                |
| 2017                                          | 27,664 (8.6%)                   | 776 (5.2%)                 |
| 2018                                          | 40,051 (12%)                    | 898 (6.1%)                 |

<sup>1</sup> Statistics presented: n (%); median (IQR)

ASA PS = American Society of Anesthesiologists Physical Status.



**Table 7.** Missingness by facility type among all cases.

| <b>Missing factor<sup>1</sup></b>             | <b>Not Missing, N = 236,157</b> | <b>Missing, N = 100,461</b> |
|-----------------------------------------------|---------------------------------|-----------------------------|
| Use of Peripheral Nerve Block                 | 1,532 (0.6%)                    | 933 (0.9%)                  |
| Surgical Procedure                            |                                 |                             |
| Lumpectomy                                    | 202,791 (86%)                   | 86,875 (86%)                |
| Mastectomy                                    | 33,366 (14%)                    | 13,586 (14%)                |
| Age                                           | 57 (46, 68)                     | 57 (46, 68)                 |
| Unknown                                       | 2,096                           | 183                         |
| ASA PS                                        |                                 |                             |
| 1                                             | 49,099 (24%)                    | 18,812 (21%)                |
| 2                                             | 96,741 (47%)                    | 43,961 (50%)                |
| 3                                             | 55,577 (27%)                    | 23,752 (27%)                |
| 4                                             | 3,232 (1.6%)                    | 1,367 (1.6%)                |
| 5                                             | 29 (<0.1%)                      | 43 (<0.1%)                  |
| 6                                             | 4 (<0.1%)                       | 1 (<0.1%)                   |
| Unknown                                       | 3,1475                          | 12,525                      |
| Male (vs Female)                              | 5,497 (2.4%)                    | 2,843 (2.9%)                |
| Unknown                                       | 9,188                           | 3,065                       |
| Facility Type                                 |                                 |                             |
| University Hospital                           | 26,528 (11%)                    | -                           |
| Large Community Hospital (over 500 beds)      | 42,931 (18%)                    | -                           |
| Medium Community Hospital (100-500 beds)      | 96,603 (41%)                    | -                           |
| Small Community Hospital (less than 100 beds) | 15,407 (6.5%)                   | -                           |
| Specialty Hospital                            | 6,206 (2.6%)                    | -                           |
| Other                                         | 48,482 (21%)                    | -                           |
| Unknown                                       | 0                               | 100,461                     |
| Facility Region                               |                                 |                             |
| Region 1 Northeast                            | 50,058 (22%)                    | 12,830 (13%)                |
| Region 2 Midwest                              | 54,499 (24%)                    | 18,808 (20%)                |
| Region 3 South                                | 77,995 (35%)                    | 47,920 (50%)                |
| Region 4 West                                 | 42,846 (19%)                    | 16,881 (18%)                |
| Unknown                                       | 10,759                          | 4,022                       |
| Workday (vs weekend/holiday)                  |                                 |                             |
| Weekend/Holiday                               | 7,137 (3.0%)                    | 3,067 (3.1%)                |
| Workday                                       | 229,020 (97%)                   | 97,394 (97%)                |
| Has Tissue Expander                           | 535 (0.2%)                      | 271 (0.3%)                  |
| Year of Procedure                             |                                 |                             |
| 2010                                          | 20,720 (8.8%)                   | 1,342 (1.3%)                |
| 2011                                          | 25,697 (11%)                    | 1,619 (1.6%)                |
| 2012                                          | 30,204 (13%)                    | 3,413 (3.4%)                |
| 2013                                          | 29,004 (12%)                    | 7,372 (7.3%)                |
| 2014                                          | 33,203 (14%)                    | 11,265 (11%)                |
| 2015                                          | 38,132 (16%)                    | 12,829 (13%)                |
| 2016                                          | 26,355 (11%)                    | 26,074 (26%)                |
| 2017                                          | 16,371 (6.9%)                   | 12,069 (12%)                |
| 2018                                          | 16,471 (7.0%)                   | 24,478 (24%)                |

<sup>1</sup> Statistics presented: n (%); median (IQR)

ASA PS = American Society of Anesthesiologists Physical Status.
